# Supplementary material for: Multiscale design, interaction mechanism and performance of CL-20/Al energetic composites with embedded structure
Source: Royal Society of Chemistry journal article supplement (doi:10.1039/d0ra07602c), 2020-01-01
Supplement: d0ra07602c1.pdf [file d0ra07602c1.pdf]

Supplementary information:

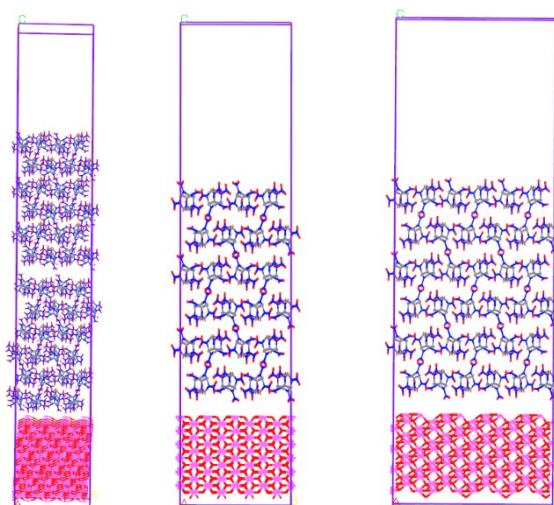

(a)  $\text{Al}_2\text{O}_3(001)$ -CL-20 (b)  $\text{Al}_2\text{O}_3(010)$ -CL-20 (c)  $\text{Al}_2\text{O}_3(100)$ -CL-20

**Fig.S1** Initial conformations of  $\text{Al}_2\text{O}_3$ -CL-20

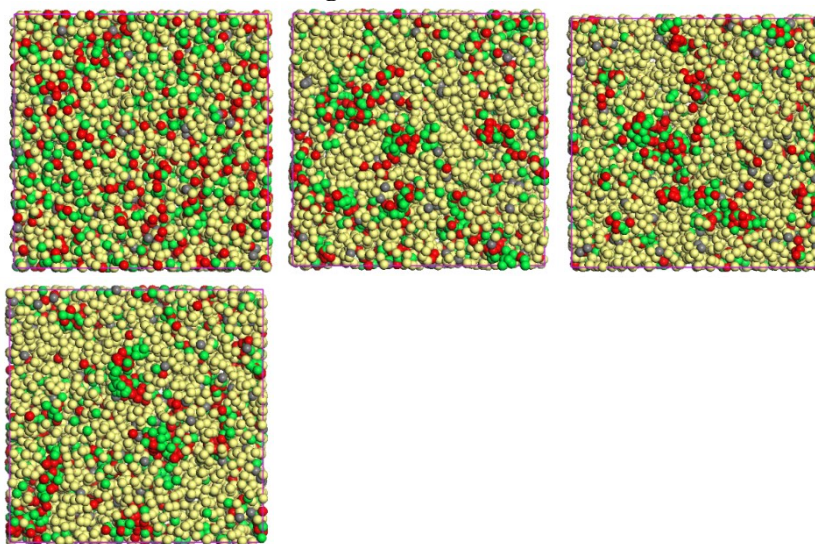

(a) 0 step (b) 80000steps (c) 12000 steps (d) 20000steps

**Fig.S2** Mesoscopic morphology of CL-20/ $\text{Al}_2\text{O}_3$  with 80% solvent volume fraction

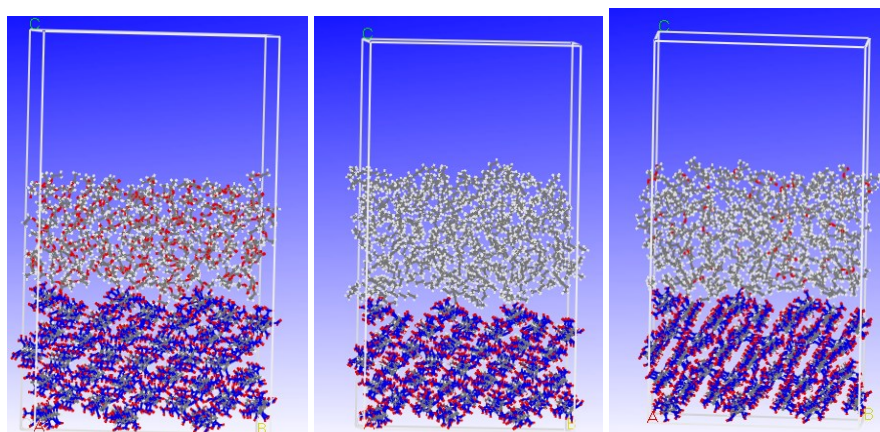

(a) CL-20 (011)- ethyl acetate (b) CL-20 (011)- hexane (c) CL-20 (011)-mixed solvents

**Fig.S3** The equilibrium conformations of CL-20 (011) face-solvent



| System               | Energy types | E/(kJ·mol <sup>-1</sup> ) |            |            |            |           |            |
|----------------------|--------------|---------------------------|------------|------------|------------|-----------|------------|
|                      |              | (0 1 1)                   | (10 -1)    | (110)      | (1 1 -1)   | (002)     | (101)      |
| CL-20/ethyl acetate  | $E_{total}$  | -145830.42                | -145372.62 | -144671.55 | -142686.26 | -78868.62 | -144491.61 |
|                      | $E_{sur}$    | -132742.00                | -132618.44 | -132407.02 | -130904.06 | -66345.46 | -132090.34 |
|                      | $E_{solv}$   | -12064.48                 | -11622.41  | -11288.47  | -11278.73  | -12061.43 | -10977.89  |
|                      | $E_{inter}$  | -1023.93                  | -1131.78   | -976.07    | -503.48    | -461.72   | -1423.37   |
| CL-20/hexane         | $E_{total}$  | -136893.87                | -135361.02 | -135561.45 | -133483.95 | -70096.26 | -135085.48 |
|                      | $E_{sur}$    | -133176.43                | -132340.51 | -133036.40 | -130844.41 | -66499.62 | -132027.72 |
|                      | $E_{solv}$   | -2981.80                  | -2343.77   | -1822.31   | -2083.98   | -2820.00  | -2153.16   |
|                      | $E_{inter}$  | -735.64                   | -676.74    | -702.74    | -555.56    | -776.64   | -904.59    |
| CL-20/mixed solvents | $E_{total}$  | -138490.13                | -137264.05 | -137429.71 | -135876.67 | -71302.82 | -136980.73 |
|                      | $E_{sur}$    | -132463.24                | -132171.06 | -132672.91 | -131135.46 | -66295.26 | -131883.39 |
|                      | $E_{solv}$   | -4662.58                  | -4507.88   | -3988.72   | -4168.88   | -4462.65  | -4393.47   |
|                      | $E_{inter}$  | -1364.31                  | -585.12    | -768.08    | -572.33    | -544.90   | -703.87    |

Note:  $E_{total}$  is the single-point energy of the equilibrium structure,  $E_{sur}$  is the single-point energy of CL-20,  $E_{solv}$  is the single-point energy of acetone in the equilibrium structure,  $E$  is the total energy of each structure, vdW is the energy of each structure obtained by the vdW interaction,  $E_{elec}$  is the energy of each structure obtained by electrostatic interaction.

**Table S4** Crystal growth parameters of CL-20 crystal habit faces in solvents

| Solvent        | (h k l)  | $E_{int}$ | $A_{acc}$ | $A_{cell}$ | $E_s$    | $E'_{att}$ | $R'_{hkl}$ |
|----------------|----------|-----------|-----------|------------|----------|------------|------------|
| Ethyl acetate  | (0 1 1)  | -1023.93  | 2035.66   | 1458.87    | -1428.77 | 1118.61    | 6.54       |
|                | (10 -1)  | -1131.78  | 2050.22   | 1551.32    | -1495.77 | 1179.22    | 6.9        |
|                | (110)    | -976.07   | 2081.43   | 1846.43    | -1100.30 | 768.66     | 4.5        |
|                | (1 1 -1) | -503.48   | 2804.45   | 1896.65    | -744.46  | 392.54     | 2.3        |
|                | (002)    | -461.72   | 1107.82   | 999.54     | -511.76  | 170.96     | 1          |
|                | (101)    | -1423.37  | 2650.51   | 2038.27    | -1850.90 | 1437.17    | 8.41       |
| Hexane         | (0 1 1)  | -735.64   | 2035.66   | 1458.87    | -1026.48 | 716.33     | 1.55       |
|                | (10 -1)  | -676.74   | 2050.22   | 1551.32    | -894.39  | 577.84     | 1.25       |
|                | (110)    | -702.74   | 2081.43   | 1846.43    | -792.19  | 460.55     | 1          |
|                | (1 1 -1) | -555.56   | 2804.45   | 1896.65    | -821.45  | 469.54     | 1.02       |
|                | (002)    | -776.64   | 1107.82   | 999.54     | -860.79  | 519.99     | 1.13       |
|                | (101)    | -904.59   | 2650.51   | 2038.27    | -1176.29 | 762.56     | 1.66       |
| Mixed solvents | (0 1 1)  | -1364.31  | 2035.66   | 1458.87    | -1903.70 | 1593.54    | 6.06       |
|                | (10 -1)  | -585.12   | 2050.22   | 1551.32    | -773.30  | 456.75     | 1.74       |
|                | (110)    | -768.08   | 2081.43   | 1846.43    | -865.85  | 534.20     | 2.03       |
|                | (1 1 -1) | -572.33   | 2804.45   | 1896.65    | -846.24  | 494.33     | 1.88       |
|                | (002)    | -544.90   | 1107.82   | 999.54     | -603.93  | 263.13     | 1          |
|                | (101)    | -703.87   | 2650.51   | 2038.27    | -915.29  | 501.56     | 1.92       |

All energies are in kJ·mol<sup>-1</sup>, distances are in Å.
